# Supplementary material
Source: PubMed Central journal article supplement (PMC4808418)
Supplement: NIHMS753668-supplement-Suplemental_Figures_1-5.pdf [file NIHMS753668-supplement-Suplemental_Figures_1-5.pdf]

# Supplement Material

## Supplemental Figure I, Castranova et al.

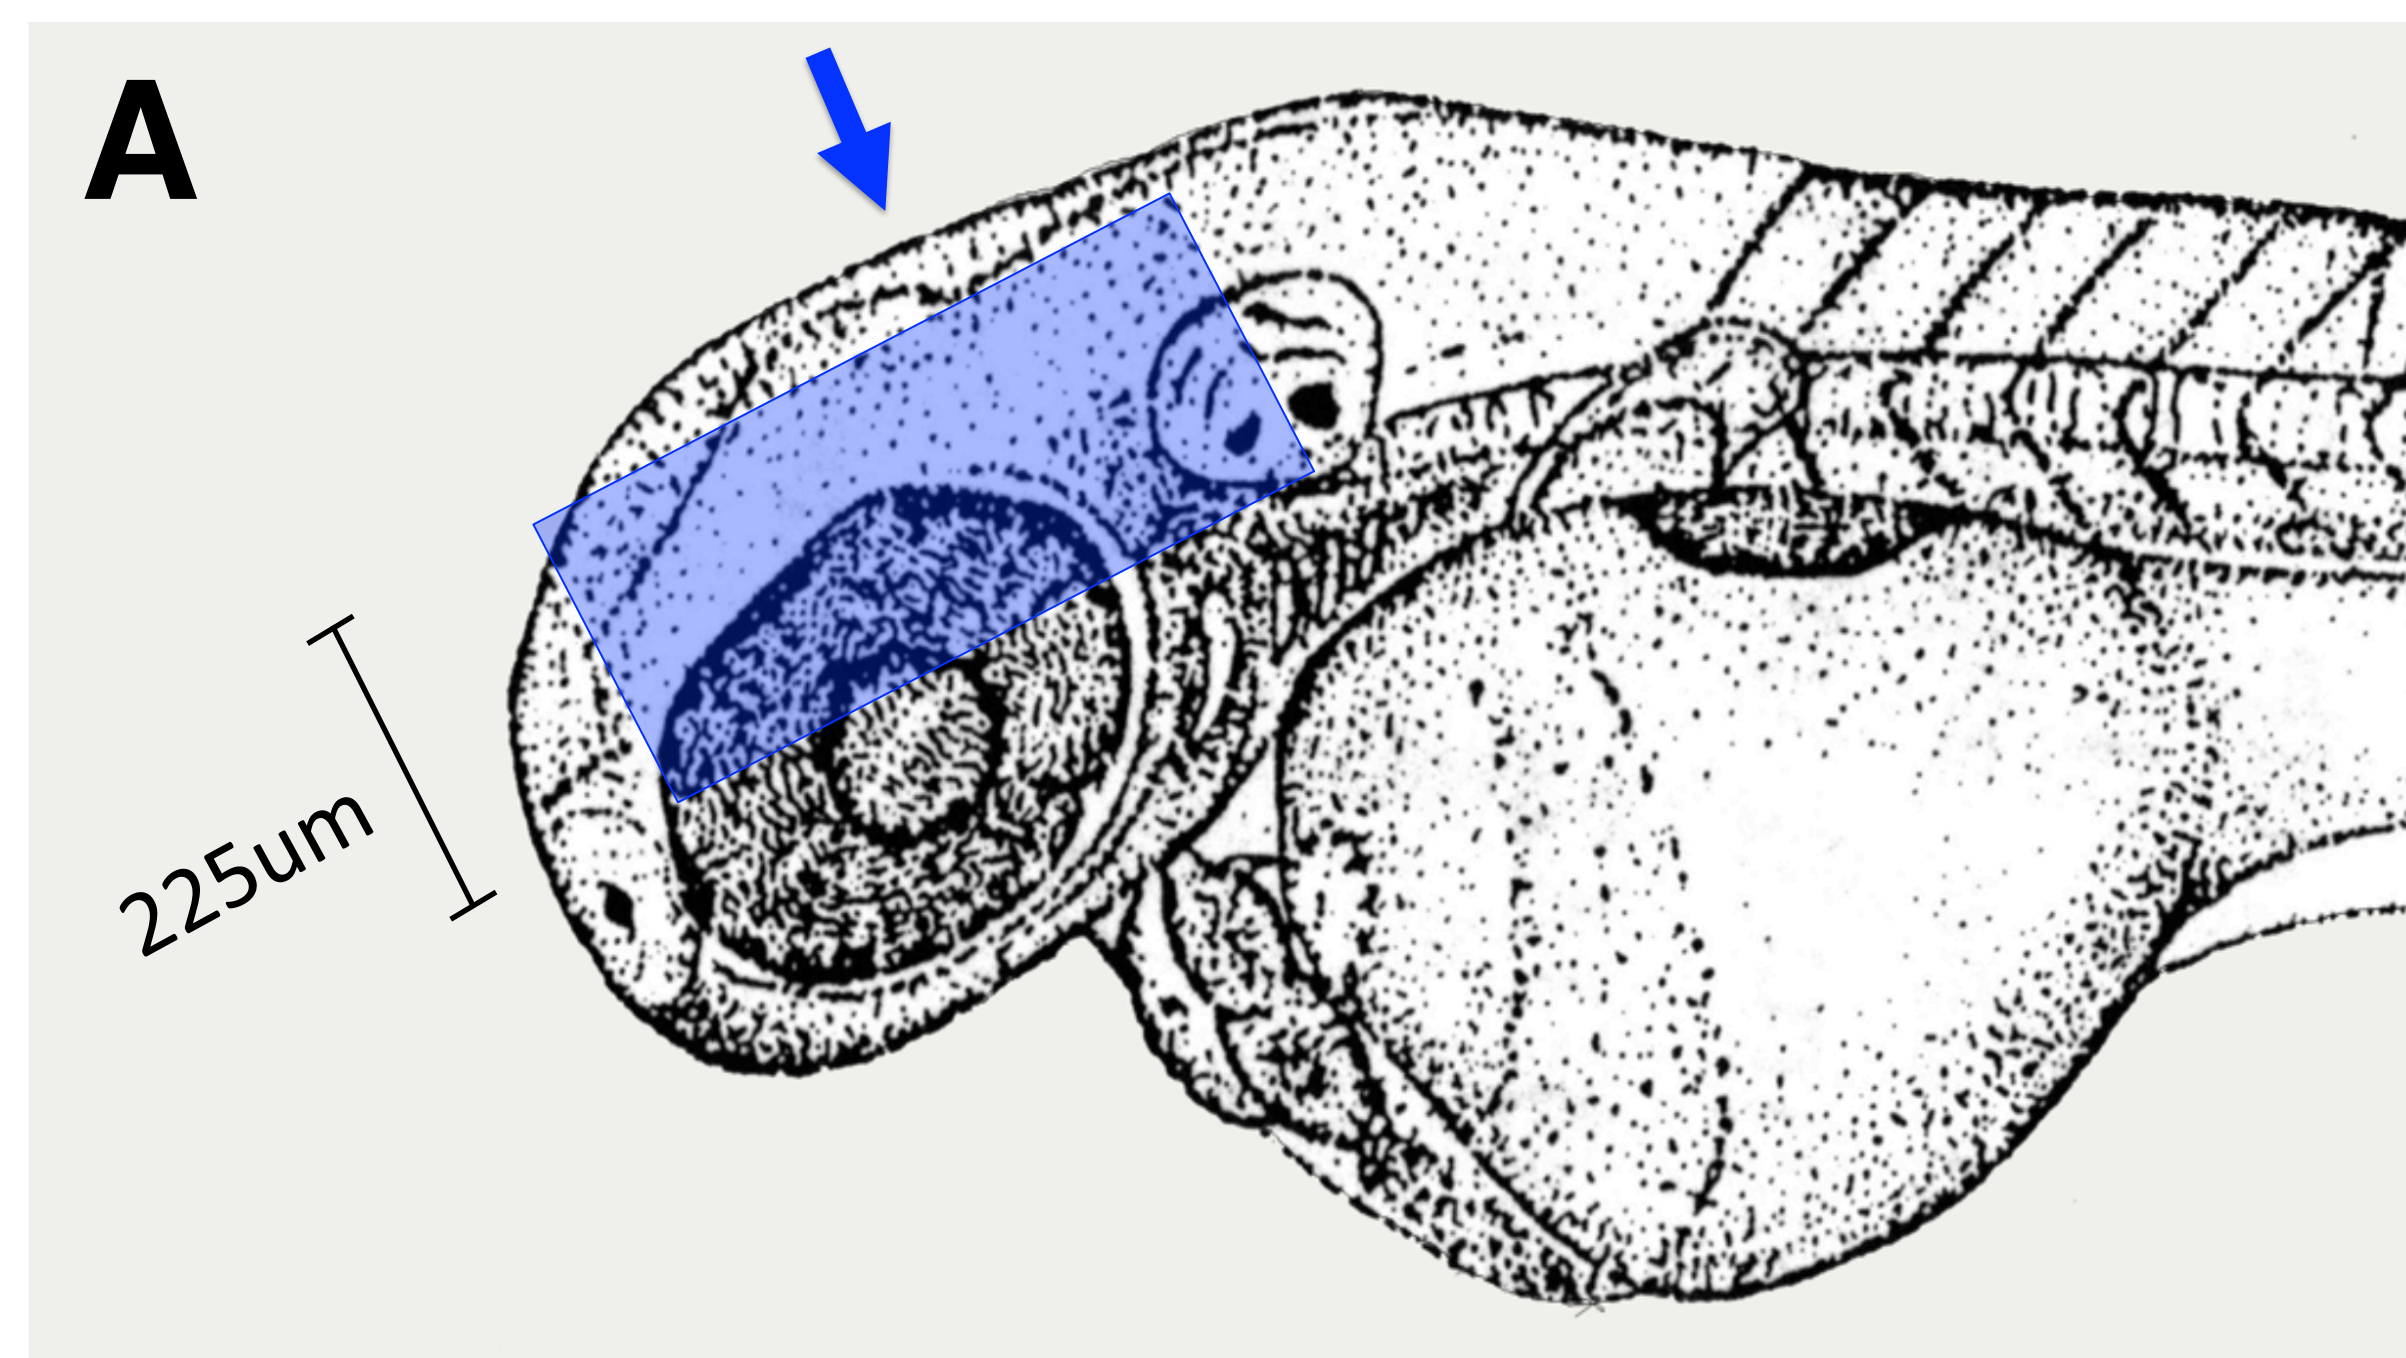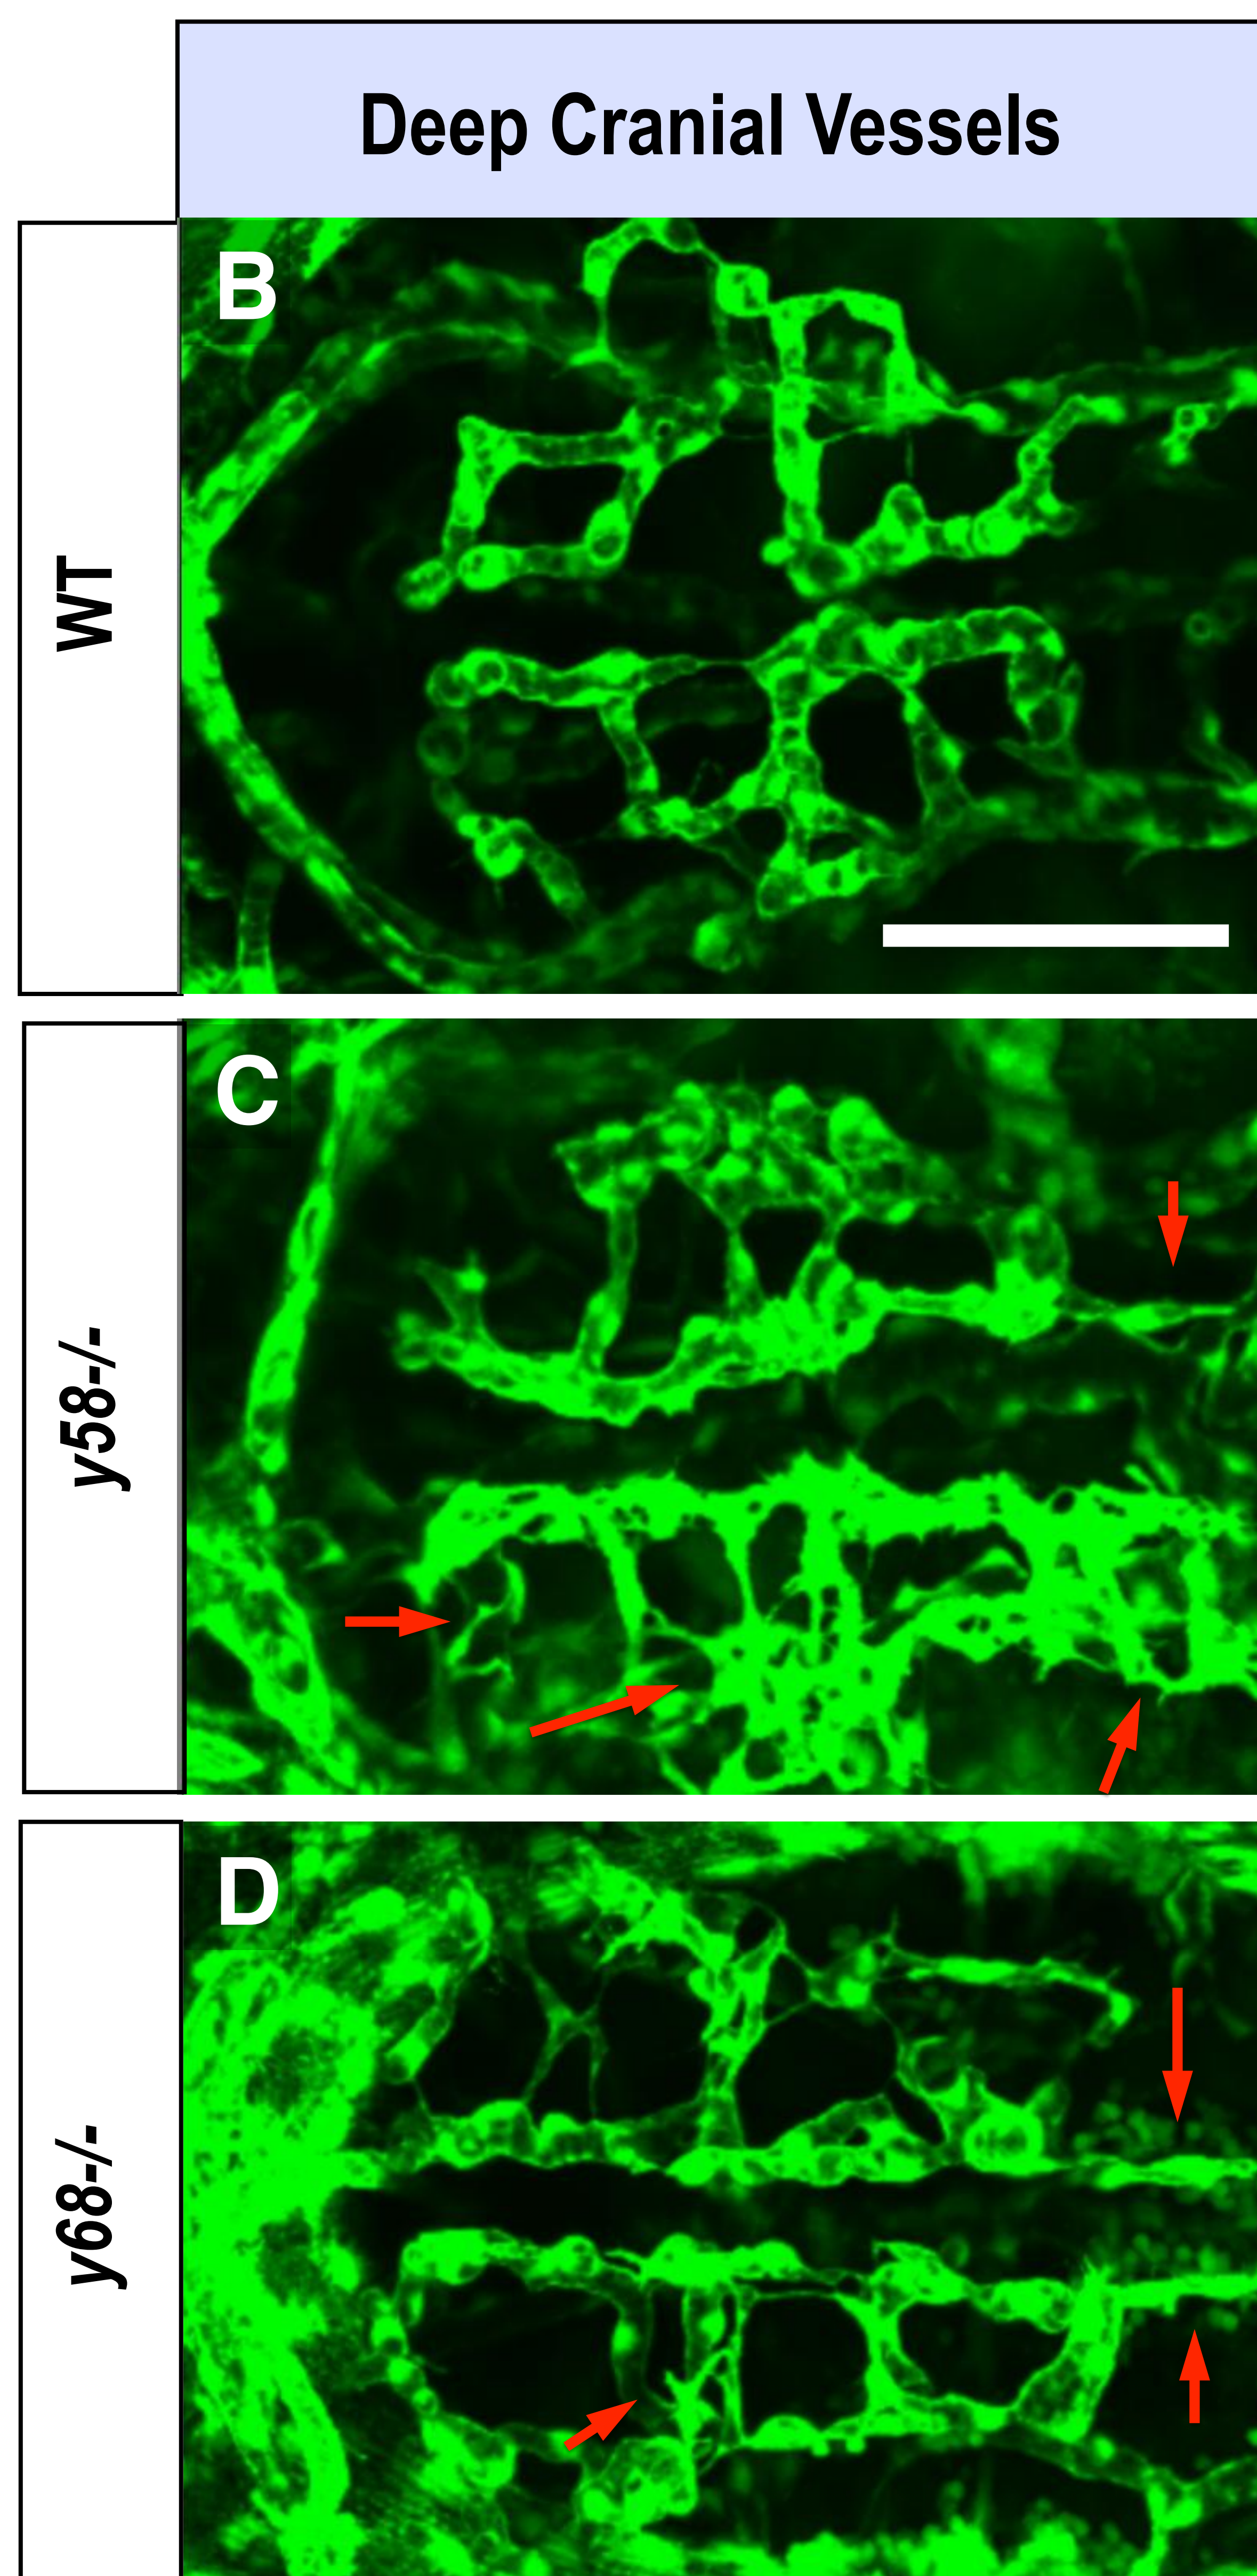

**S Fig 1. Zebrafish y58 and y68 mutants display excess angiogenesis in deep cranial vessels.** (A) Schematic diagram of a 2 dpf zebrafish head (modified from (22)), with a blue box showing the approximate position of images in B-D. (B-D) Confocal fluorescence micrographs of the cranial vasculature (with dorsal most cranial vessels omitted) of 2 dpf *Tg(fli1a-EGFP)<sup>y1</sup>* transgenic wild type sibling (B), *Tg(fli1a-EGFP)<sup>y1</sup> y58* mutant (C), and *Tg(fli1a-EGFP)<sup>y1</sup> y68* mutant (D) animals. Dorsal views, rostral to the left. Arrows in C, and D note ectopic vessel branches observed in y58 and y68 mutant animals. Scale bar = 100 μm (B).



Supplemental Figure II, Castranova et al.

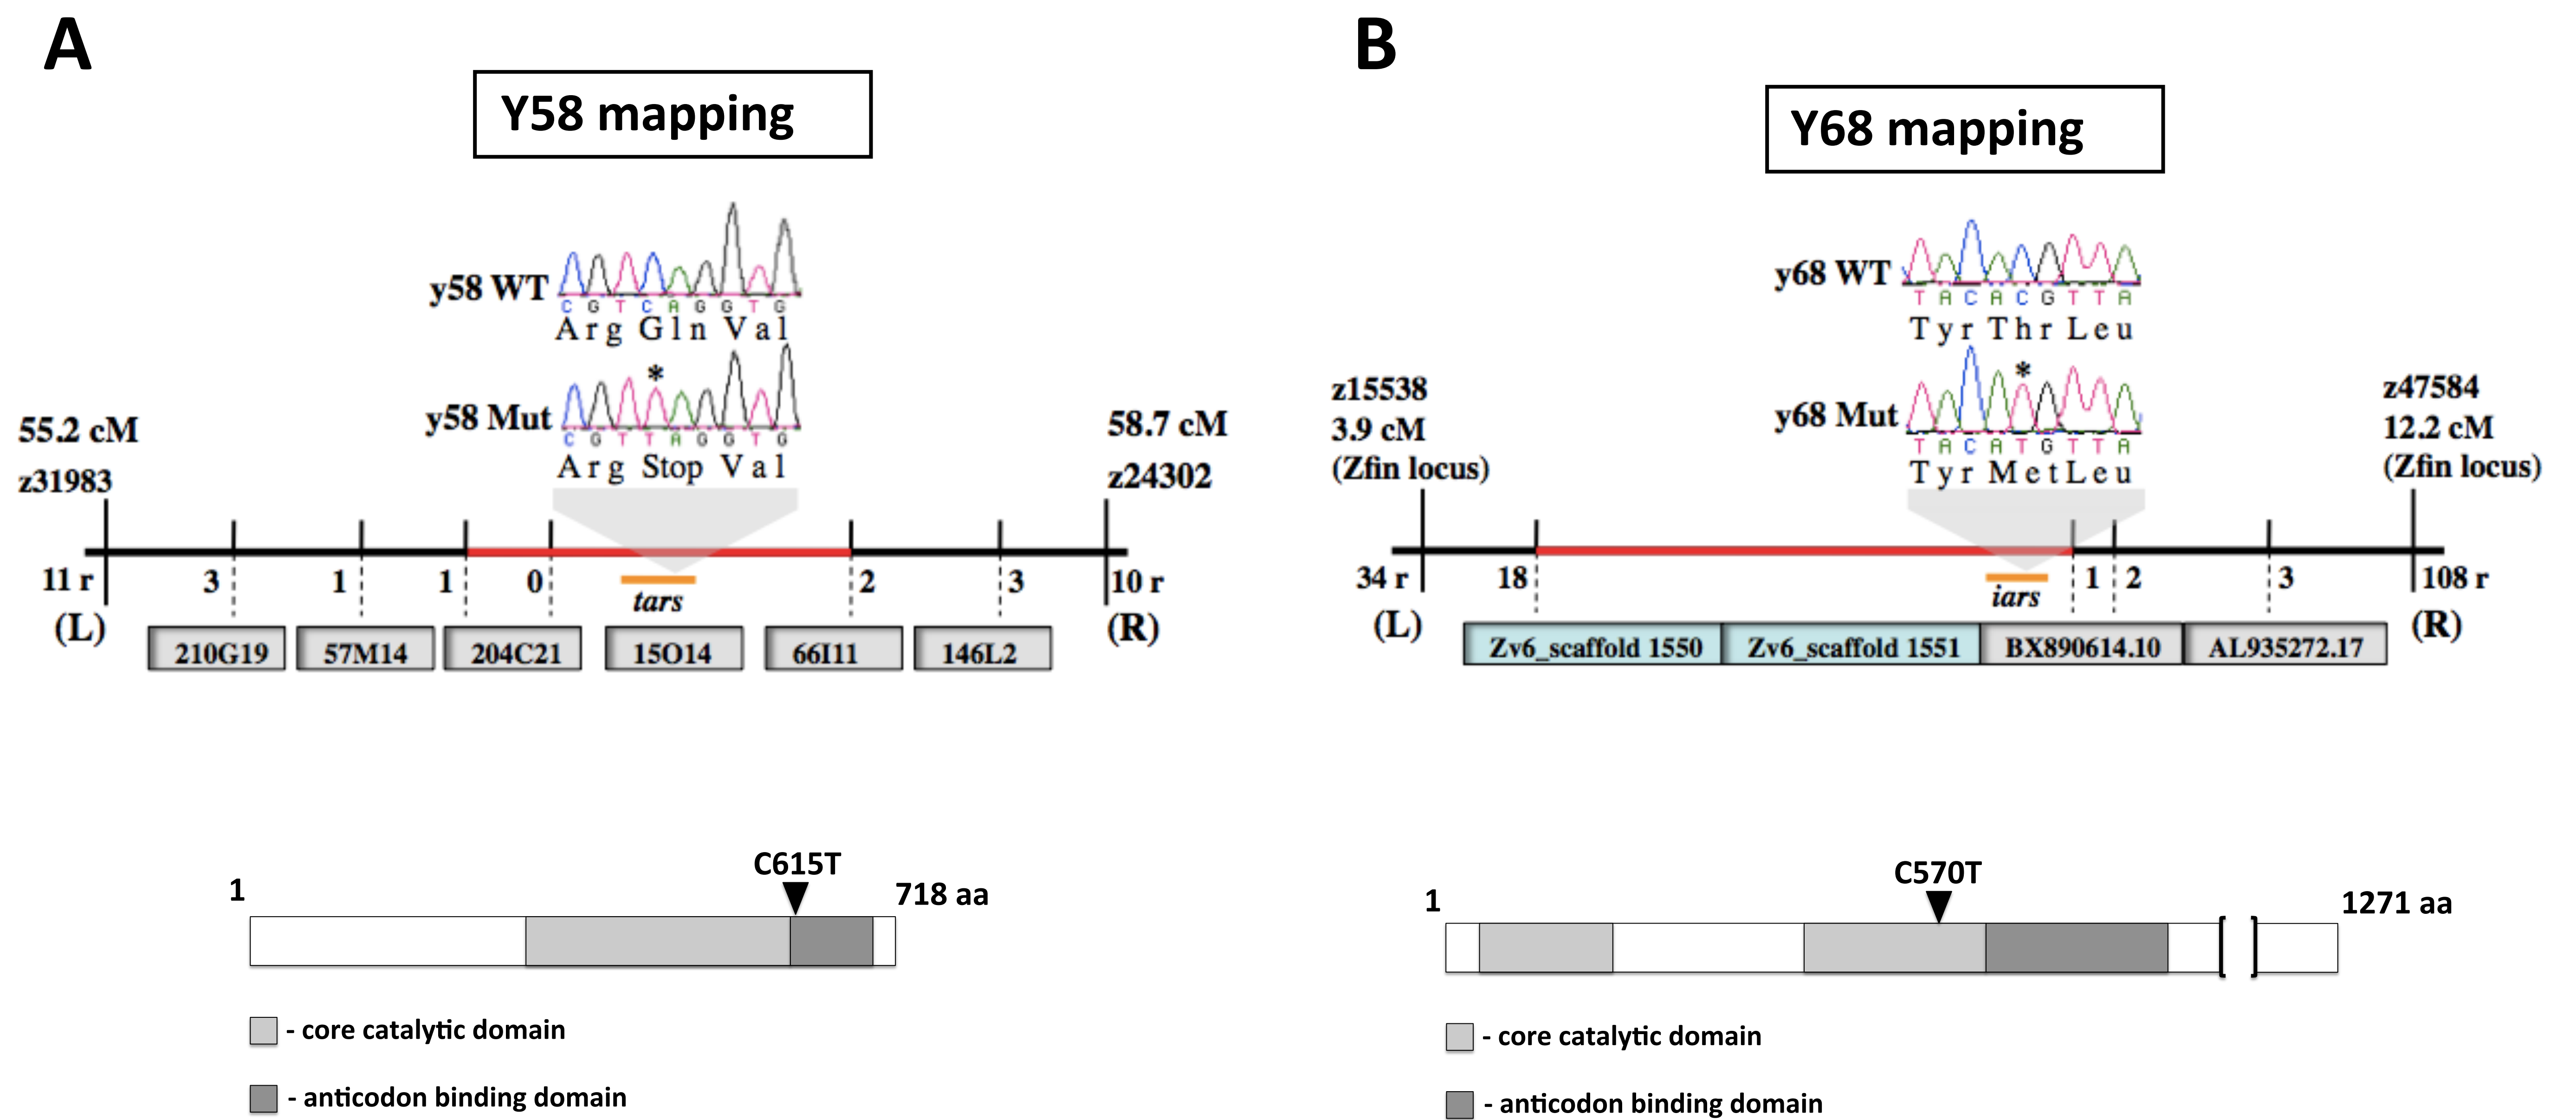

**S Fig II. Mapping and positional cloning of the y58 and y68 mutants. (A)** Mapping and positional cloning of y58, revealing a mutation in the *threonyl tRNA synthetase (tars)* gene resulting in early termination of the polypeptide sequence prior to the anticodon binding domain of the enzyme. **(B)** Mapping and positional cloning of y68, revealing a mutation in the *isoleucyl tRNA synthetase (iars)* gene changing a conserved threonine in the core catalytic domain to a methionine.

## Supplemental Figure III, Castranova et al.

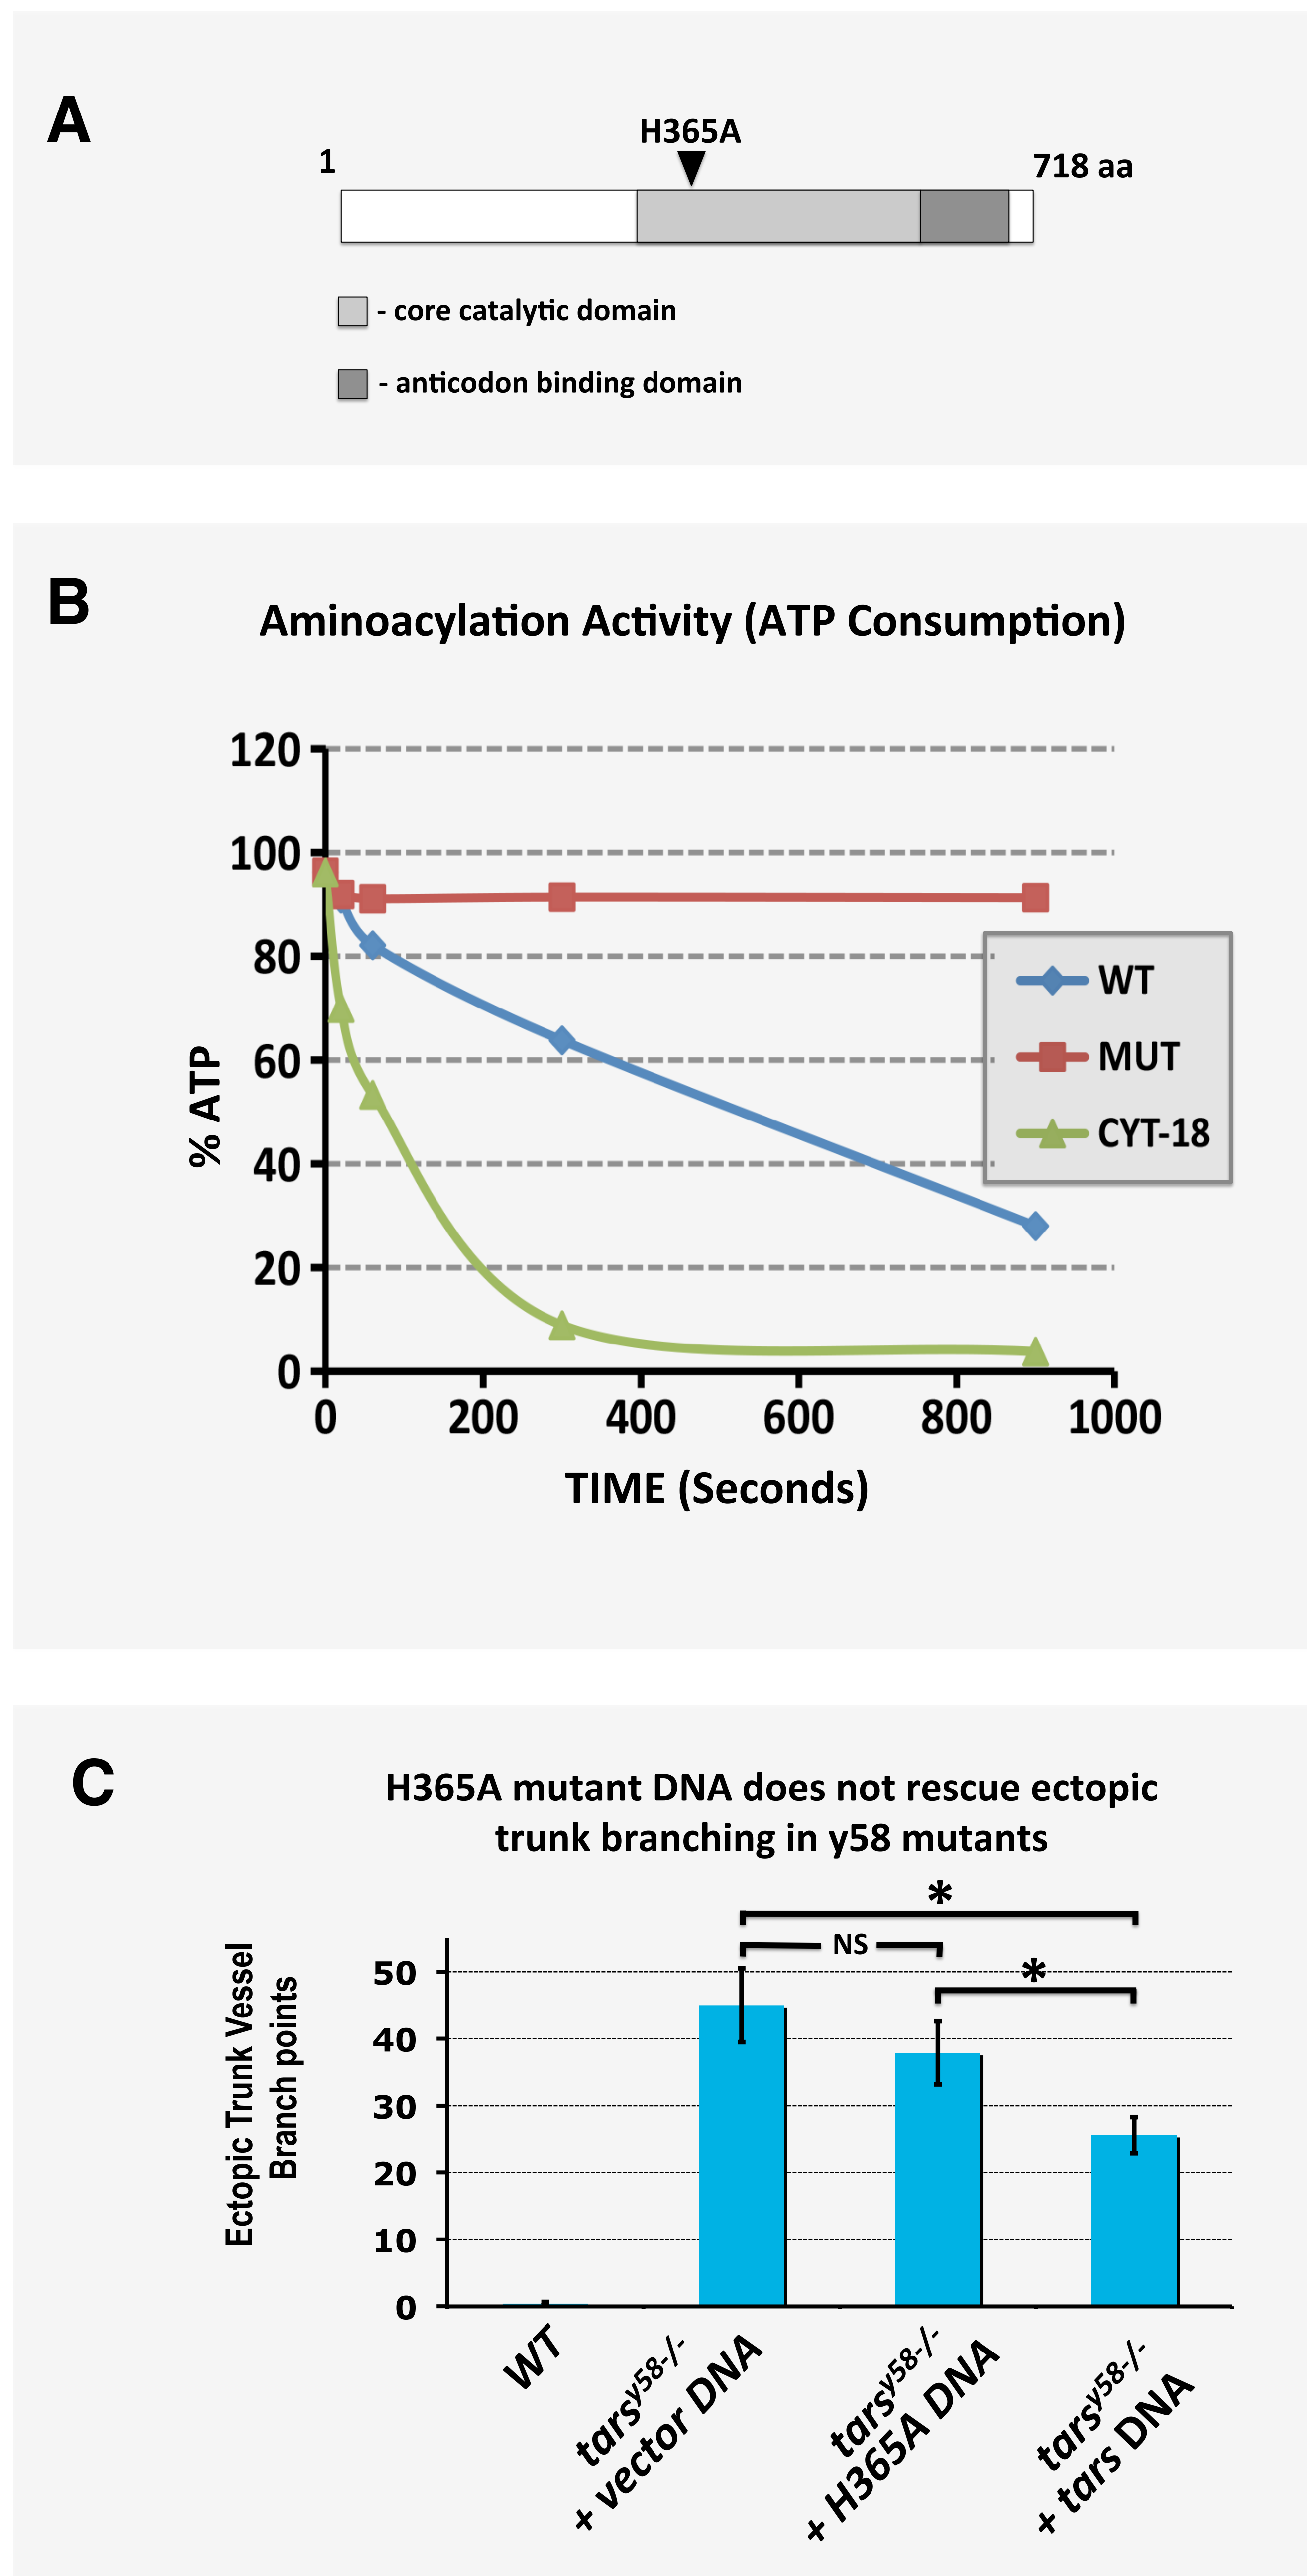

**S Fig III. Kinase-dead TARS does not rescue the defects in *tars* mutants.** (A) Diagram showing *tars* polypeptide and the position of the mutation changing a conserved histidine in the active site to an alanine. (B) Graph showing ATP consumption vs. time in an *in vitro* aminoacylation assay using purified zebrafish wild type *tars* and mutant *tars*(H365A) protein, with purified *N. crassa* Tyrosyl RNA synthetase (CYT-18) as a positive control. (C) Quantitation of the number of ectopic trunk intersegmental vessel branch points observed in phenotypically wild type (WT) siblings (Column 1, N = 10), *Tol2(beta-actin:mCherry)*-injected *tars<sup>y58-/-</sup>* mutants (Column 2, N = 9), *Tol2(beta-actin:tars<sup>H365A</sup>-2A-mCherry)*-injected *tars<sup>y58-/-</sup>* mutants (Column 3, N = 9), or *Tol2(beta-actin:tars<sup>WT</sup>-2A-mCherry)*-injected *tars<sup>y58-/-</sup>* mutants (Column 4, N = 10). Significance at P < 0.05 is noted with an asterisk in panel C.



Supplemental Figure IV, Castranova et al.

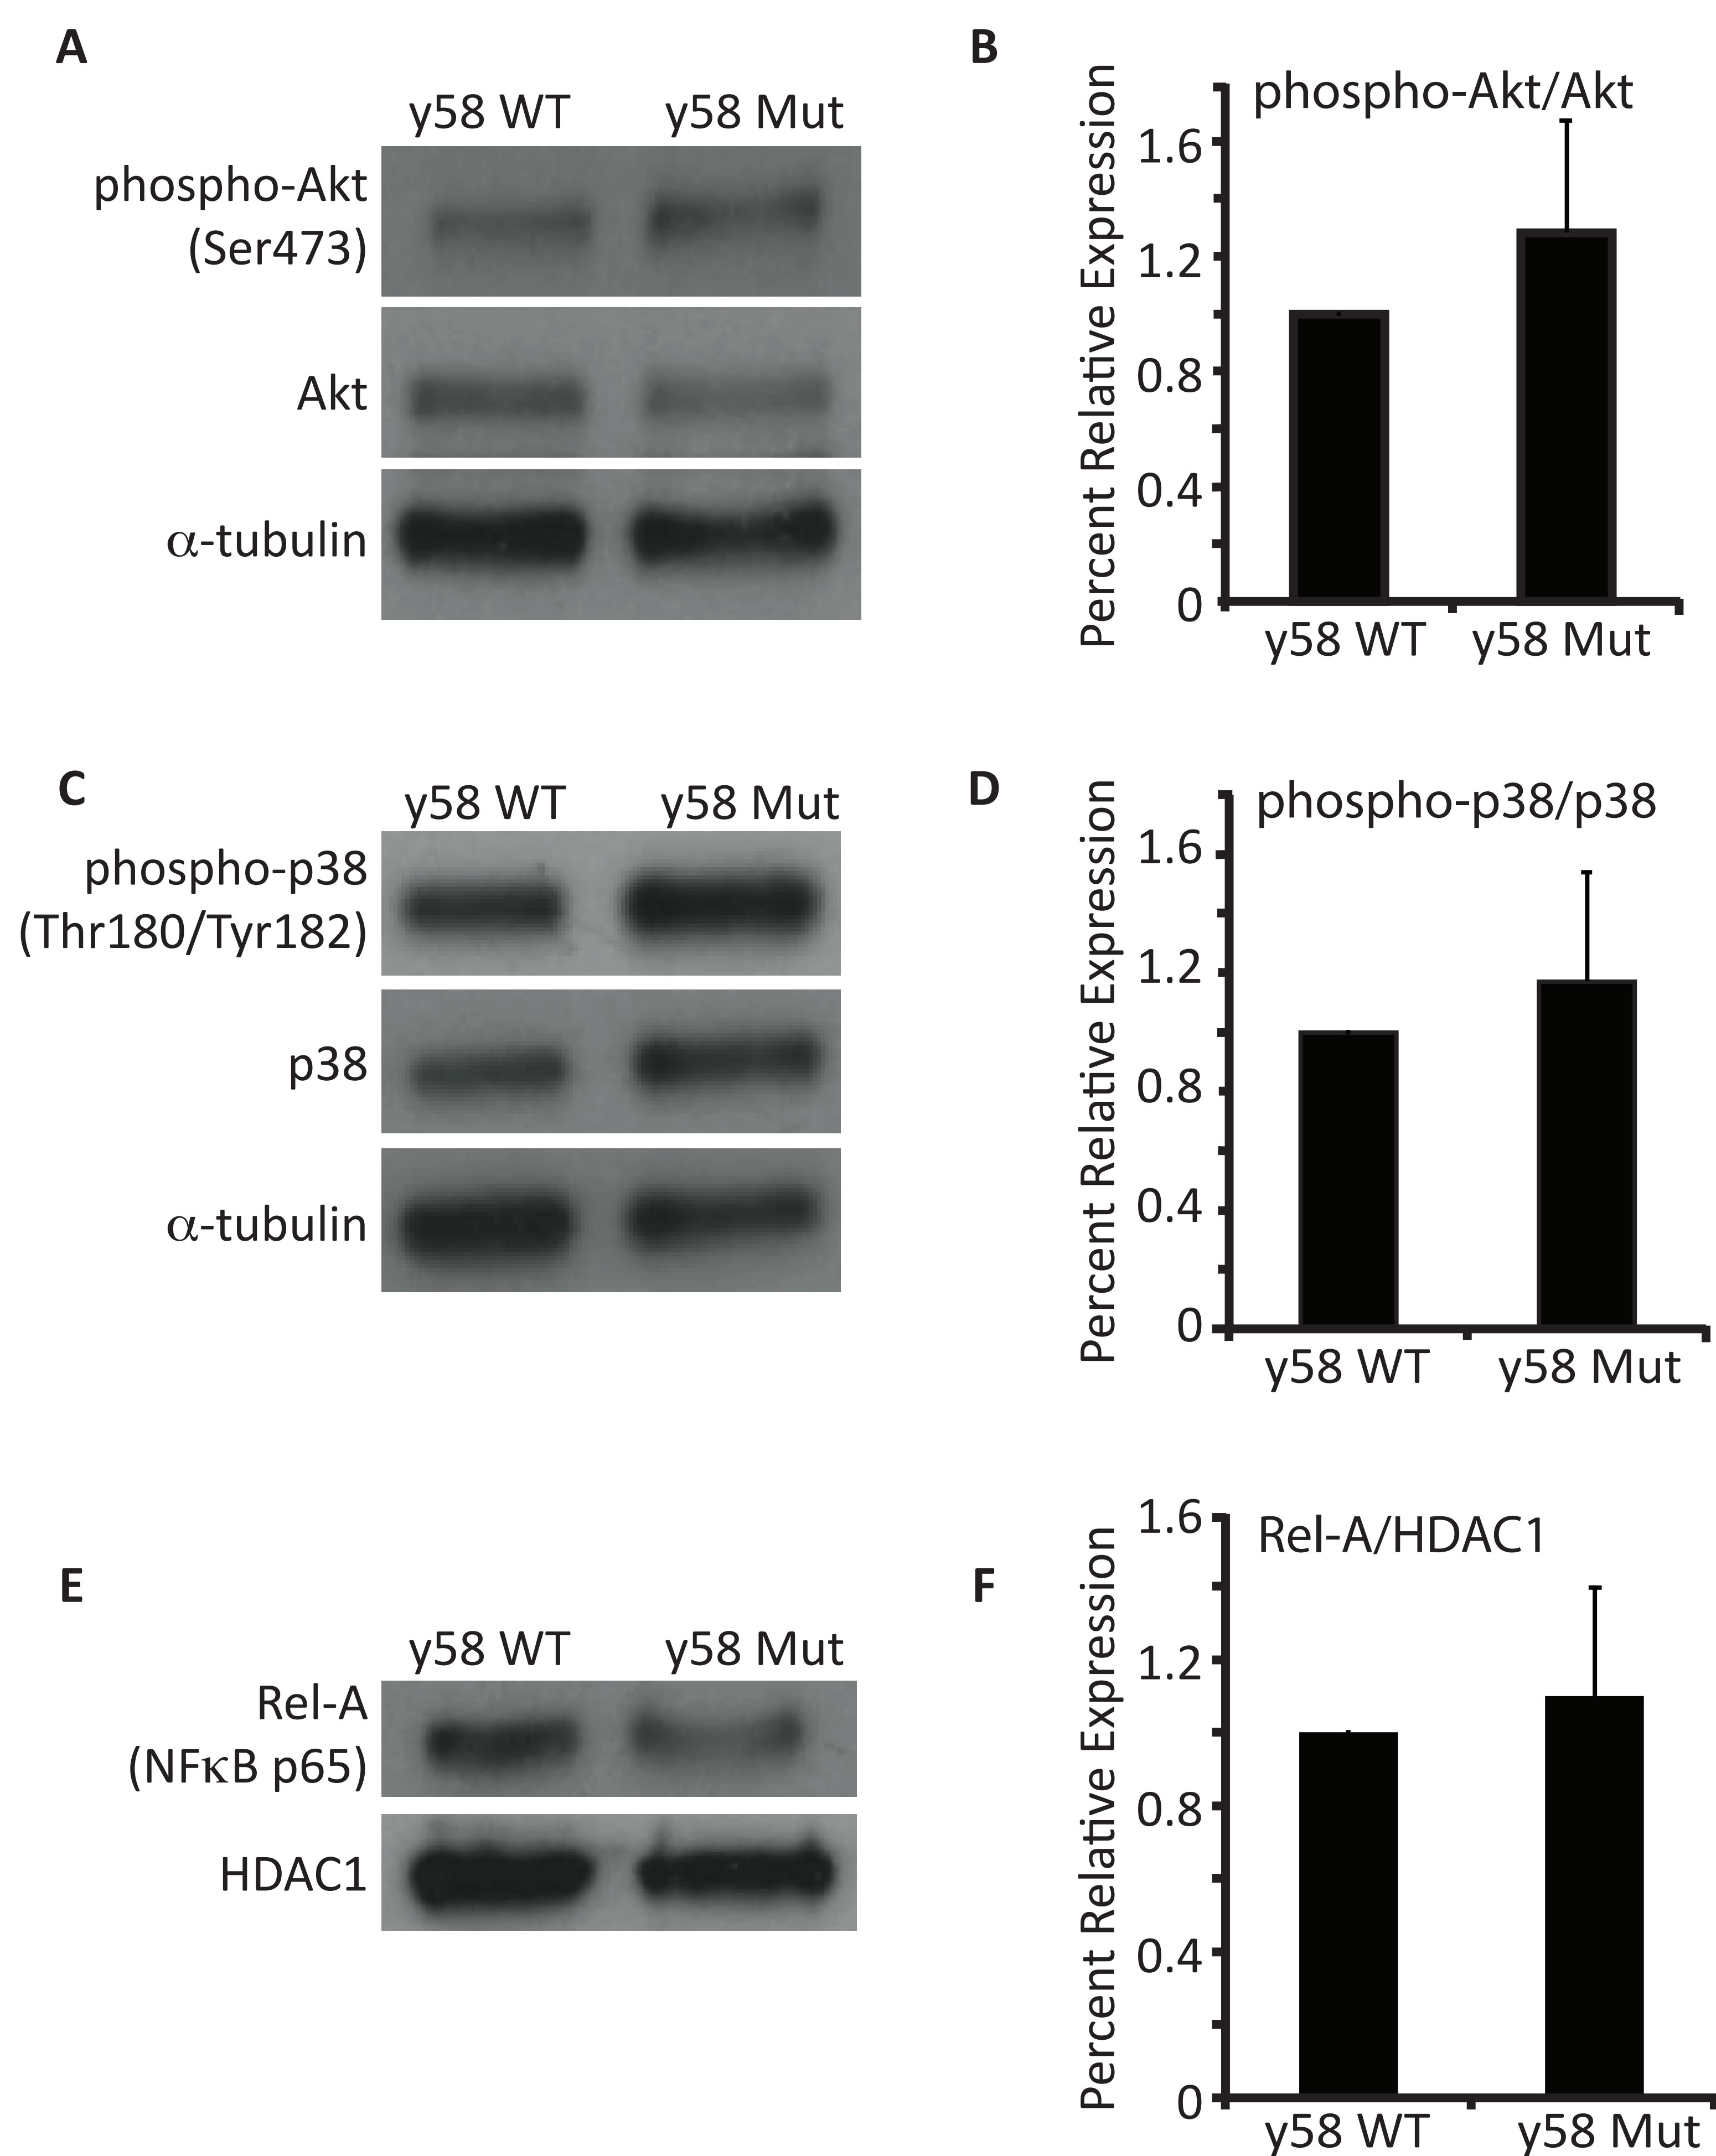

**S Fig IV. Western blots assaying potential activation of additional stress pathways.** (A-E) (A, C, E) Western blot analysis of downstream components of the PI3K pathway (A), the p38 pathway (C), and the NF $\kappa$ B pathway (E) in y58 mutants and control siblings. (B) Quantification of Akt Western blot, normalizing phospho-Akt expression to total Akt expression. (D) Quantification of p38 Western blot, normalizing phospho-p38 expression to total p38 expression. (F) Quantification of nuclearly expressed Rel-A Western blot, normalizing Rel-A to nuclear loading control, HDAC1.



Supplemental Figure V, Castranova et al.

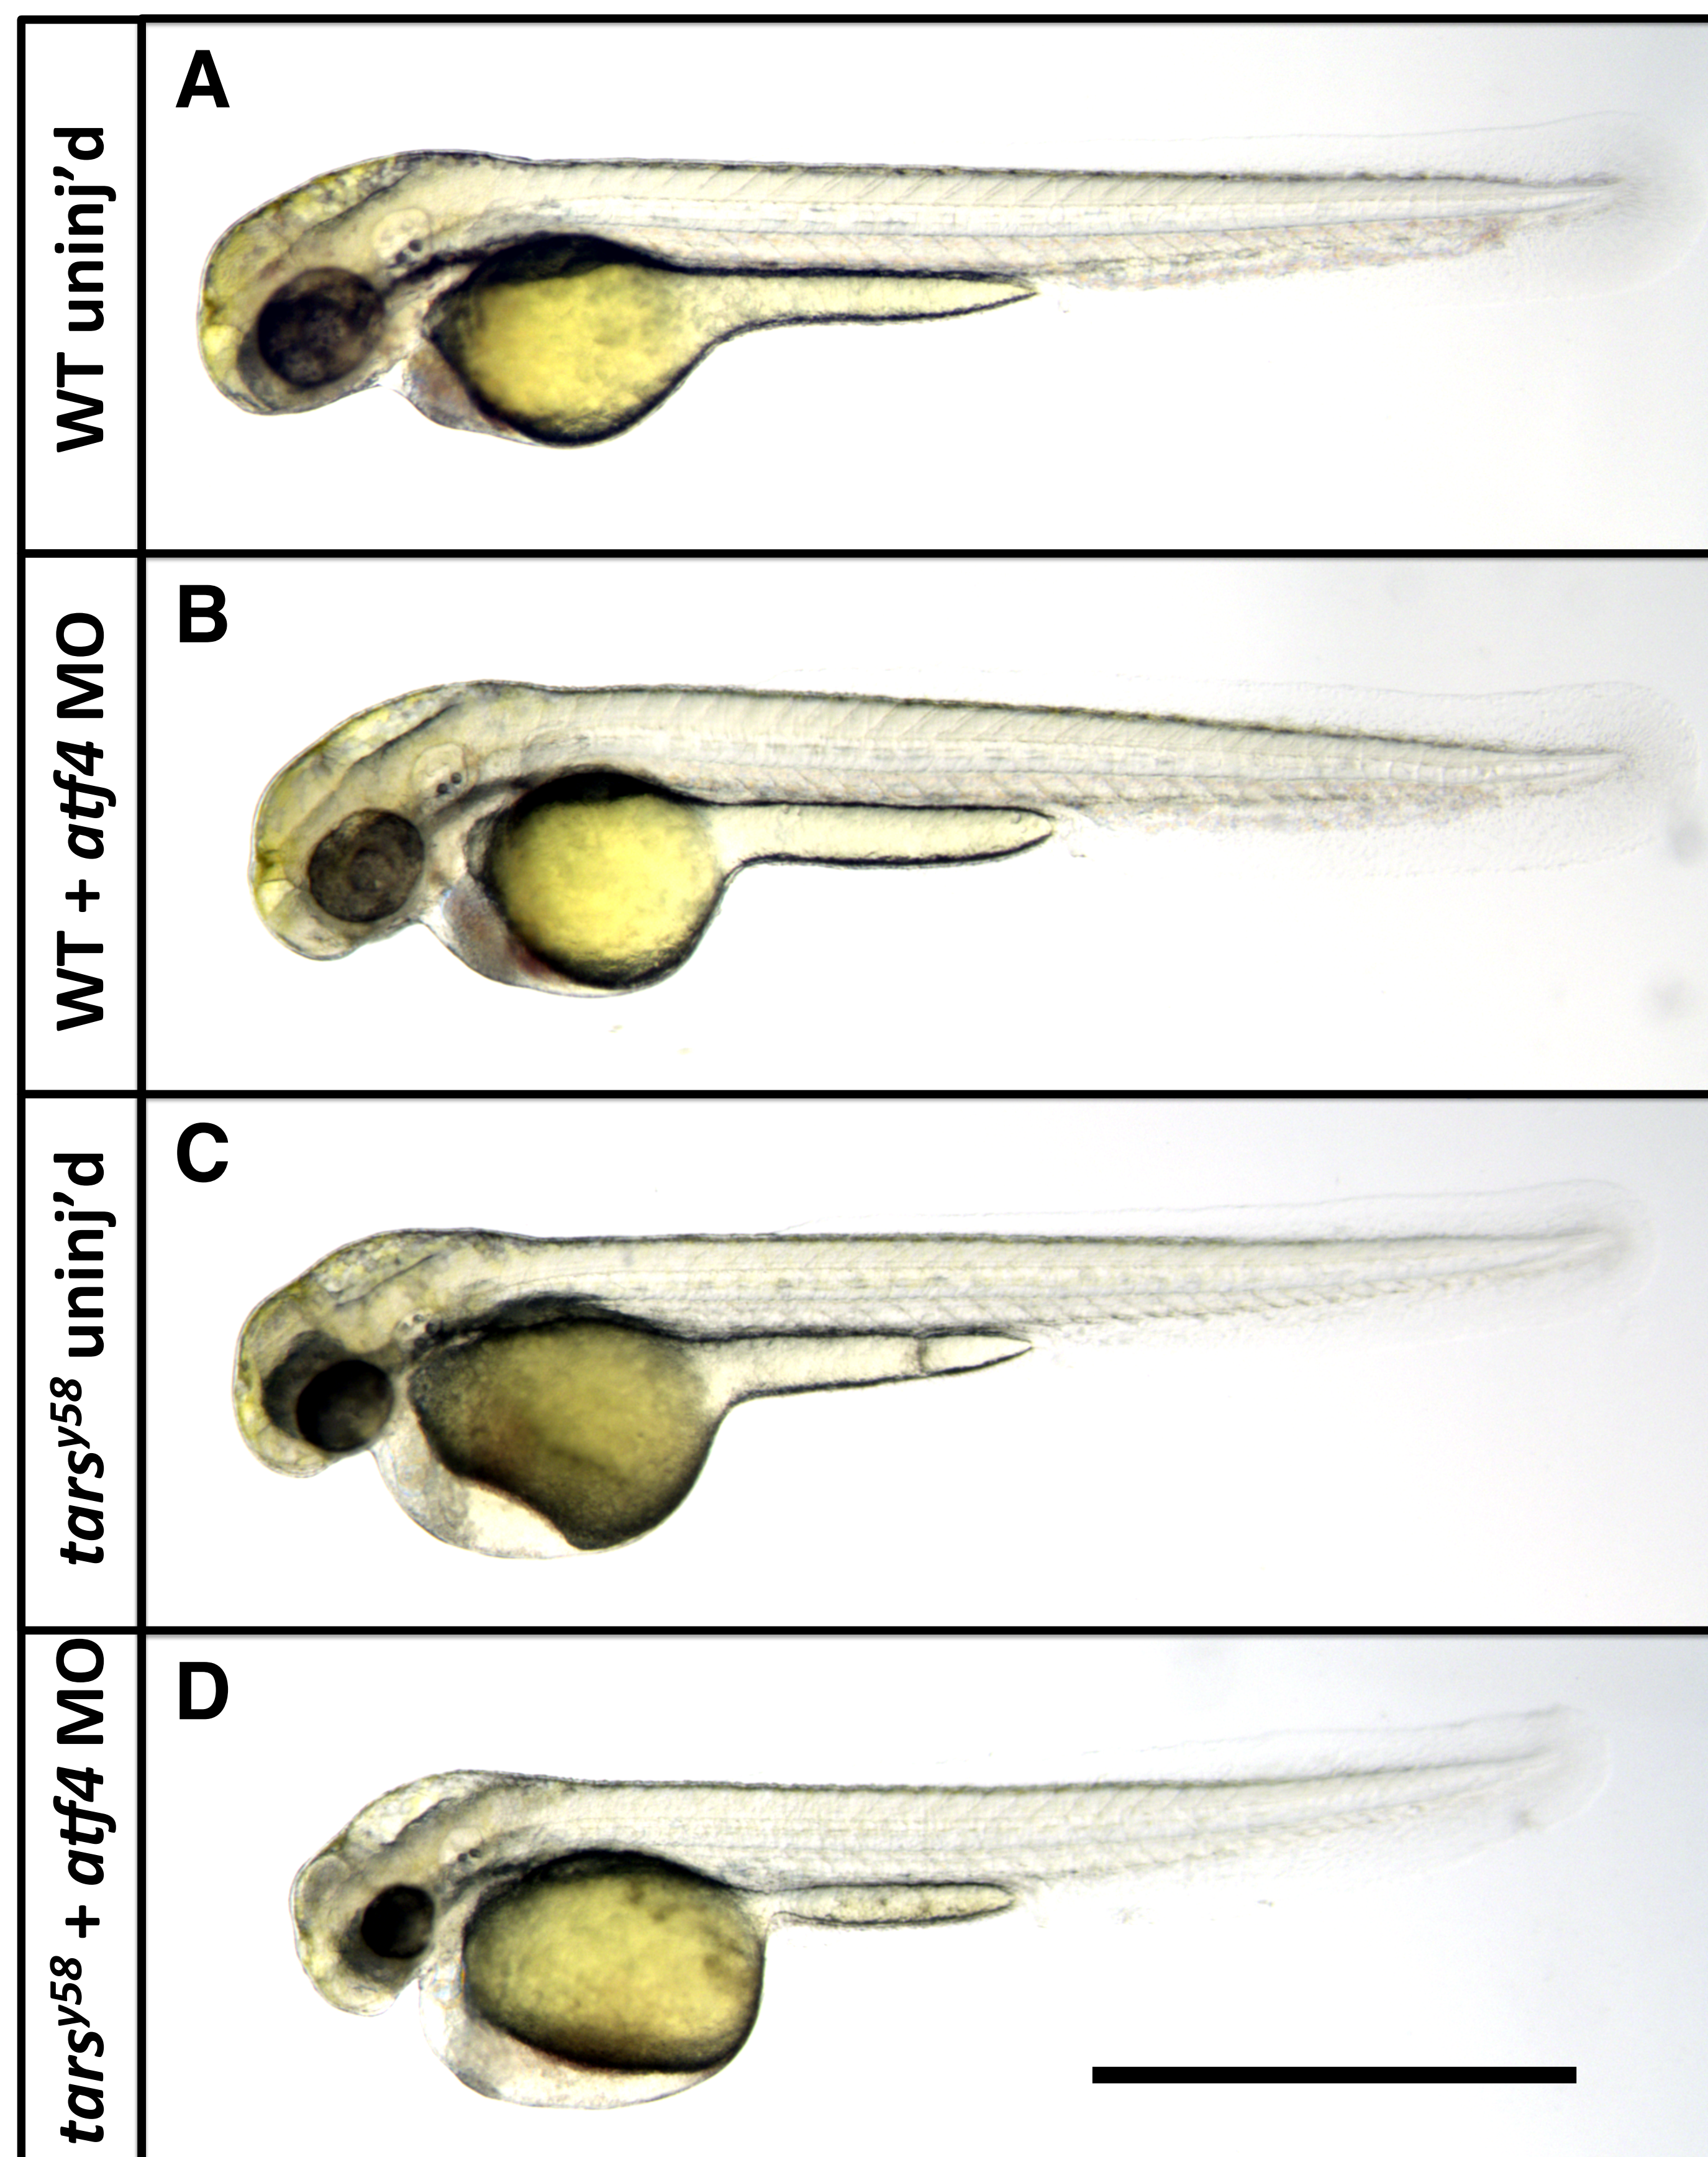

**S Fig V.** Transmitted light images of wild type sibling and *tars<sup>y58</sup>* mutant animals with or without *atf4* MO injection. (A-D) Transmitted light images of the same animals imaged in Figure 4 panels A-D. 3 dpf wild type sibling (A,C) or *tars<sup>y58/-</sup>* mutant (B,D) *Tg(fli1α-EGFP)<sup>y1</sup>* larvae that were either un-injected (A,B) or injected with 2.5 ng of *atf4* morpholino (C,D). Scale bar = 500 μm.
